# Supplementary material
Source: publisher figshare collection journal article supplement (https://acs.figshare.com/ndownloader/files/3887797)
Supplement: Supplementary file 1 [file 3887797]

# Effects of Cobalt Addition on the Catalytic Activity of the Ni-YSZ Anode Functional Layer and the Electrochemical Performance of Solid Oxide Fuel Cells

Ting Guo, Xiaolei Dong, Mandar M. Shirolkar, Xiao Song, Meng Wang, Lei Zhang, Ming Li, and Haiqian Wang\*

Hefei National Laboratory for Physical Sciences at Microscale, University of Science and Technology of China, 96 Jinzhai Road, Hefei, Anhui 230026, P. R. China

Tel.: +86 551 63603770.

Fax: +86 551 63606266.

E-mail: hqwang@ustc.edu.cn.

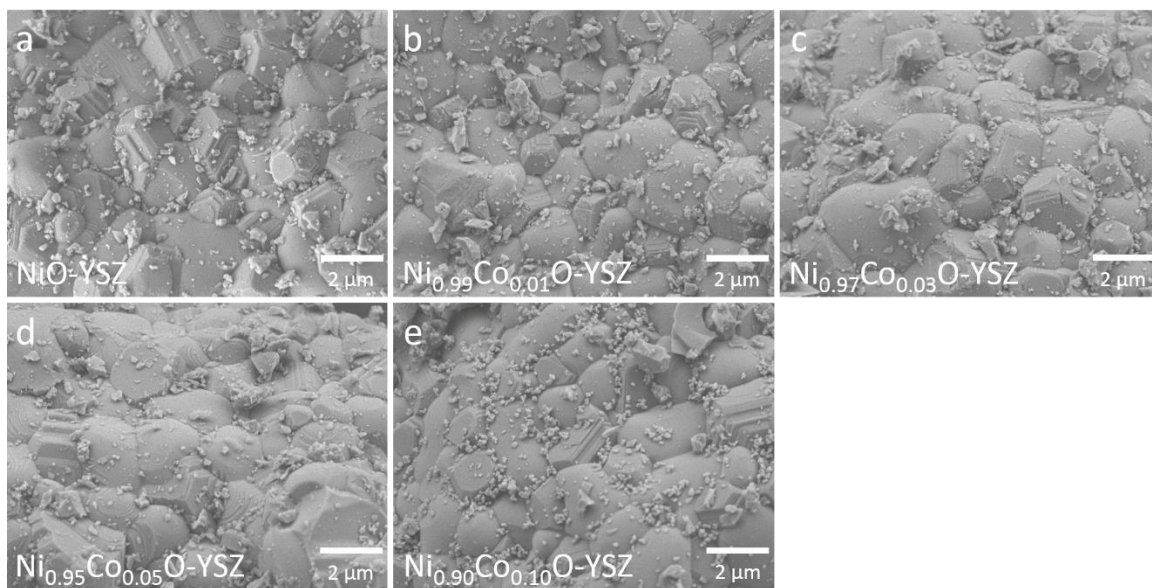

**Figure S1.** The SEM images of different  $\text{Ni}_{1-x}\text{Co}_x\text{O-YSZ}$  powders used for the TG measurements.
